# Supplementary material for: A quick and versatile one step metal–organic chemical deposition method for supported Pt and Pt-alloy catalysts
Source: Royal Society of Chemistry journal article supplement (doi:10.1039/d0ra03001e), 2020-01-01
Supplement: d0ra03001e1.pdf [file d0ra03001e1.pdf]

## Supplementary Information

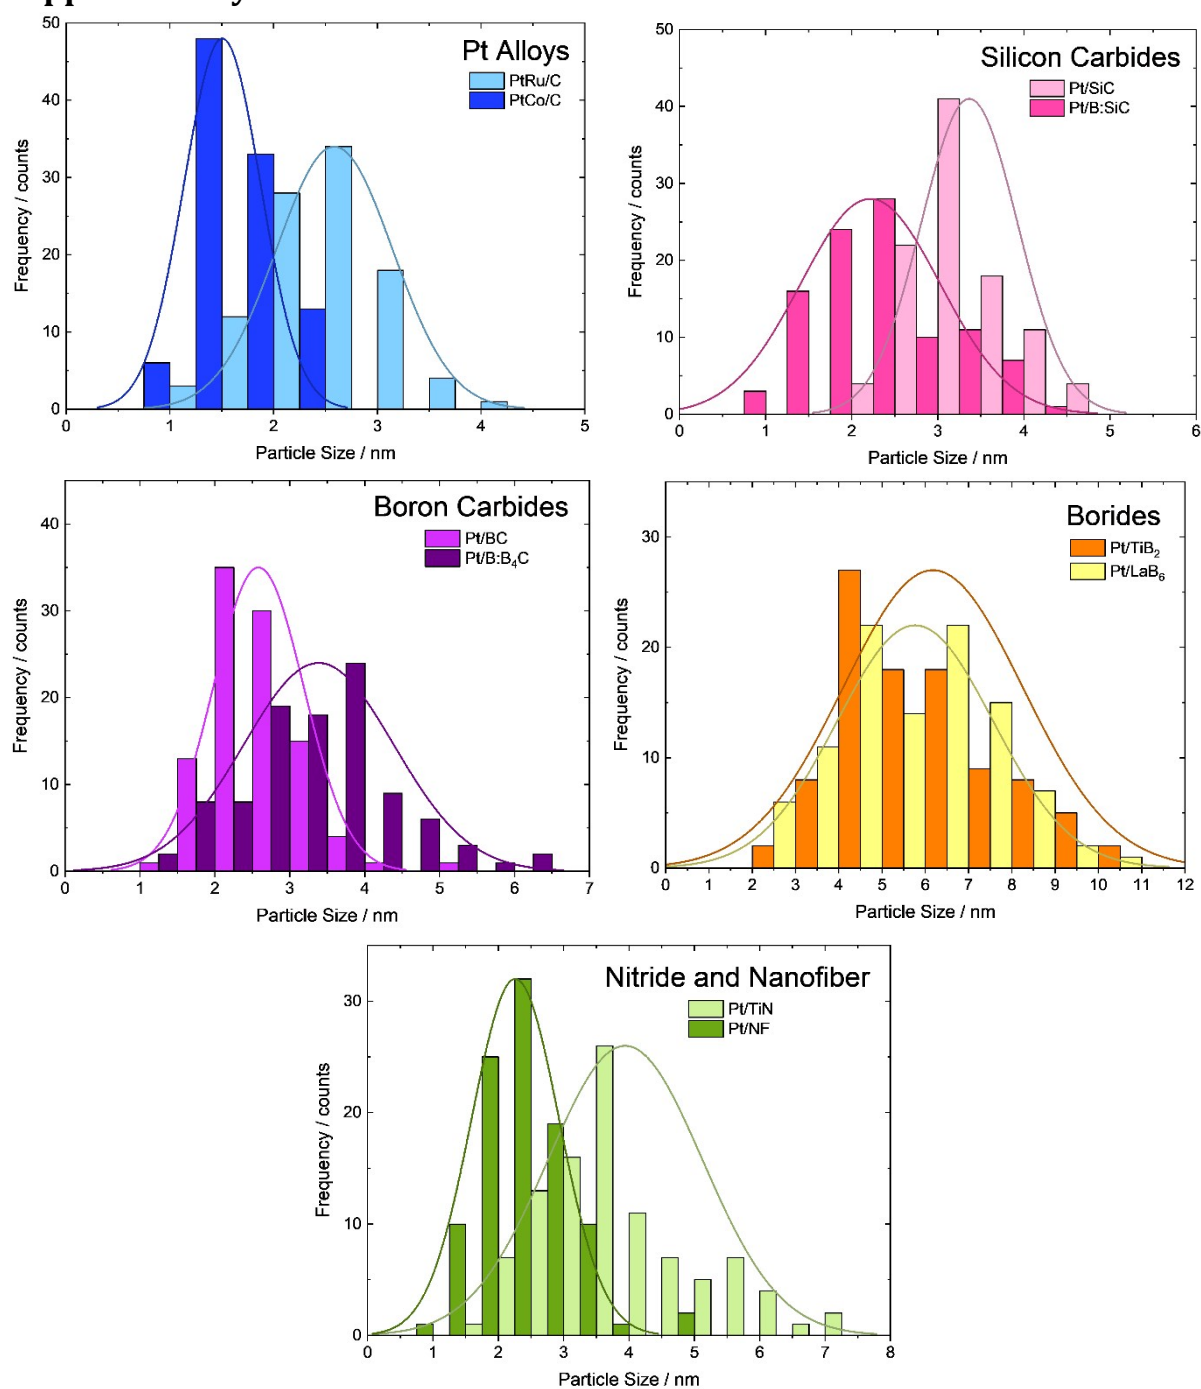

**Figure S1:** TEM particle size distribution for each of the Pt/Pt Alloy and support materials investigated.

**Table S1:** XRD d-spacing determined from Pt(311) peak for each of the MOCD prepared and commercial Pt/C catalysts.

| Catalyst               | XRD d-spacing / Å |
|------------------------|-------------------|
| MOCD 20 wt% Pt/C       | 1.39              |
| MOCD 40 wt% Pt/C       | 1.38              |
| MOCD 60 wt% Pt/C       | 1.38              |
| Commercial 20 wt% Pt/C | 1.38              |
| Commercial 40 wt% Pt/C | 1.39              |
| Commercial 60 wt% Pt/C | 1.39              |

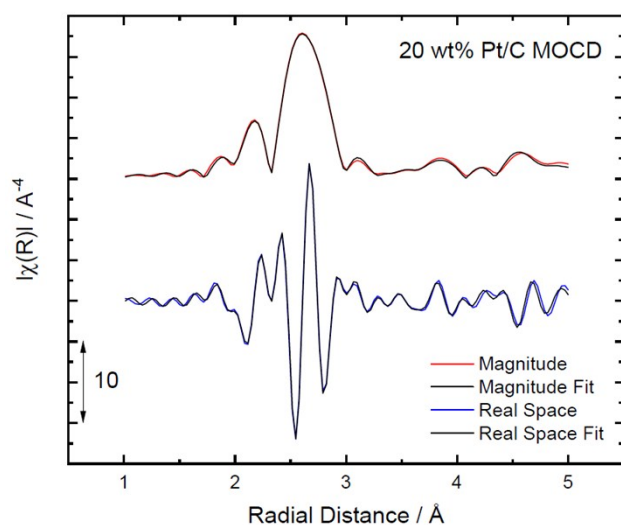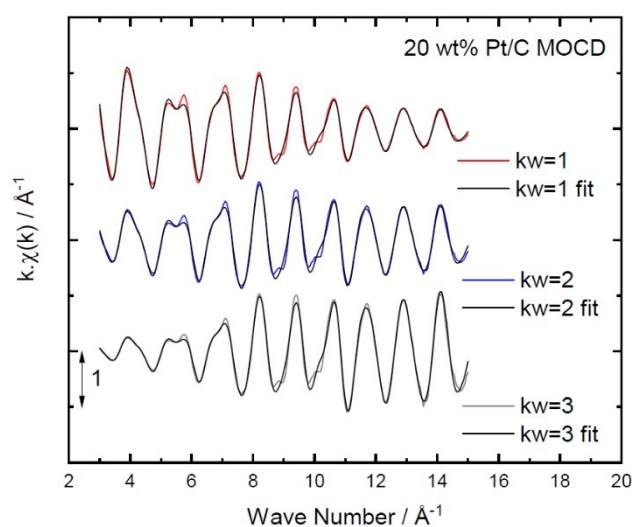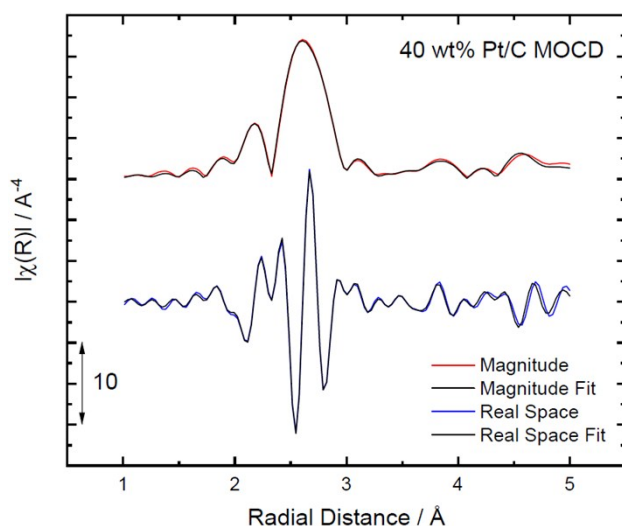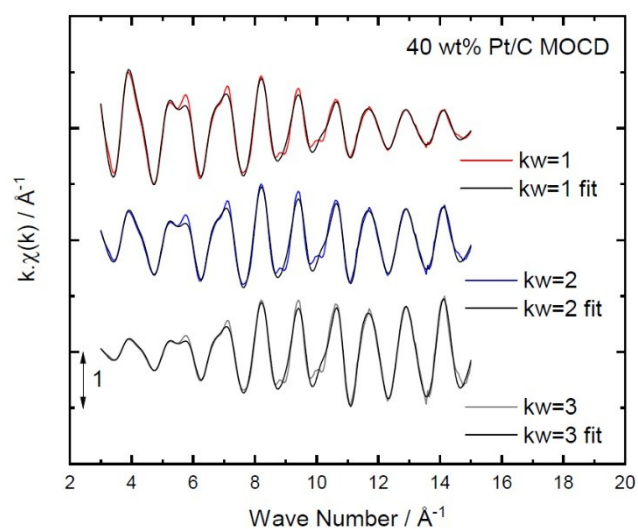

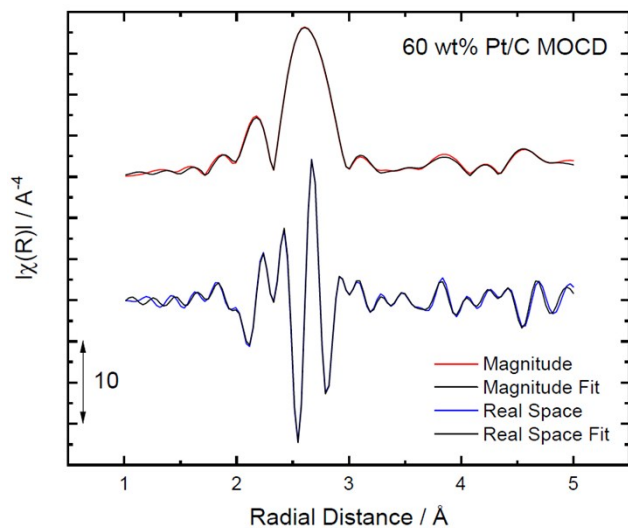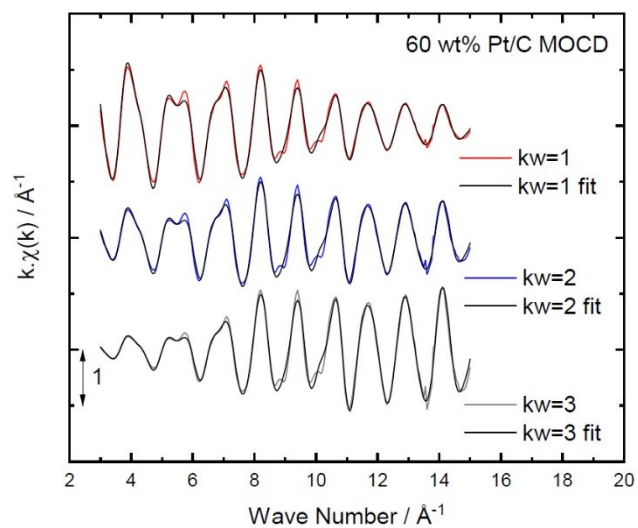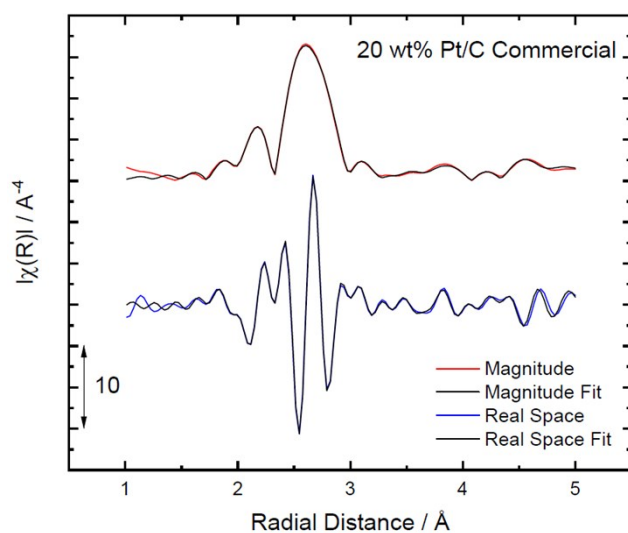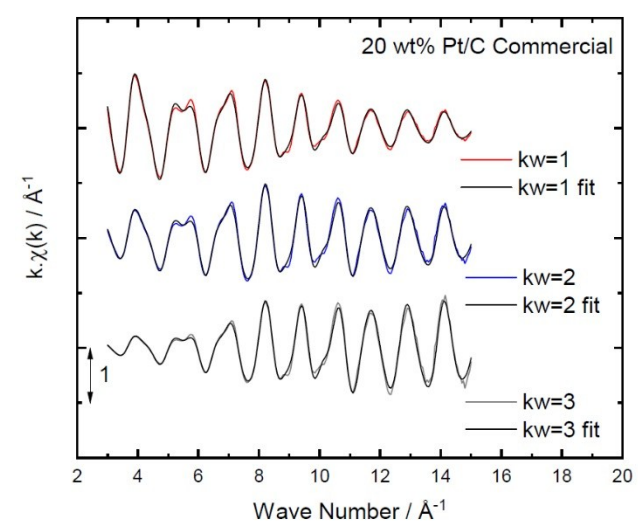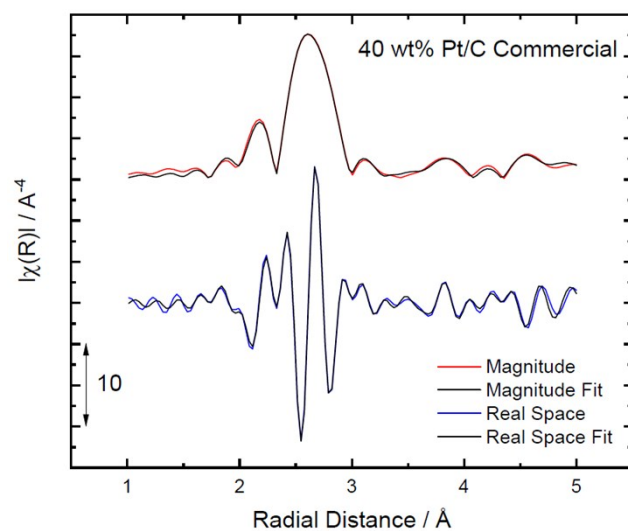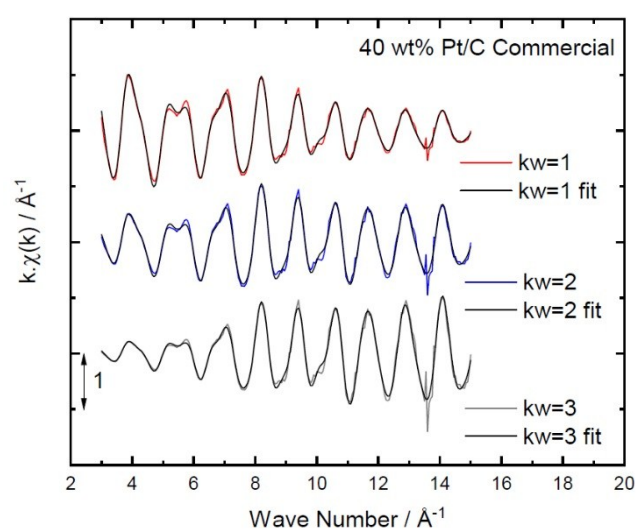

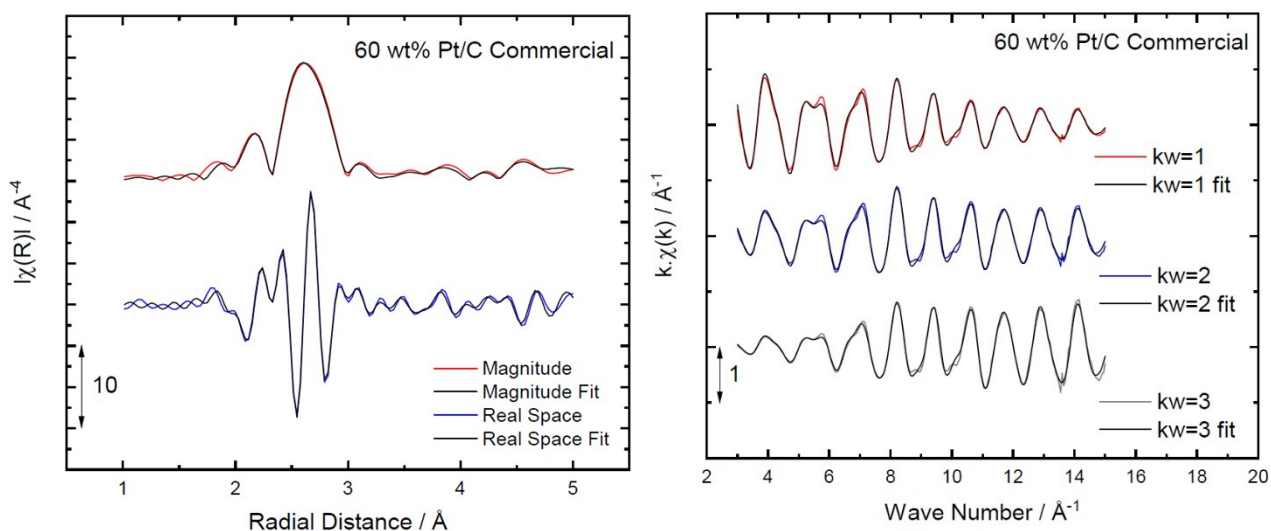

**Figure S2:** EXAFS R space magnitude and real space plots and k space plots, k weighting ( $kw$ )=1 is scaled by 7.93, 7.646, 8.2,  $kw=2$  is unscaled and  $kw=3$  is scaled by 0.12, 0.113, 0.12 for the 20, 40 and 60 wt% Pt/C MOCD catalysts, respectively. Pt/C Commercial catalysts k space plots, k weighting ( $kw$ )=1 is scaled by 7.403, 7.638, 7.763,  $kw=2$  is unscaled and  $kw=3$  is scaled by 0.106, 0.108, 0.111 for the 20, 40 and 60 wt% Pt/C commercial catalysts, respectively.

**Table S2:** Coordination numbers and distances of neighbouring atoms and their disorder factors of the 20 wt% Pt/C MOCD and commercial catalyst.

| Catalyst               | Neighbouring atom    | N          | R (Å)* | $\sigma^2 / 10^3$ | N <sub>3</sub> /N <sub>1</sub> |
|------------------------|----------------------|------------|--------|-------------------|--------------------------------|
| MOCD 20 wt% Pt/C       | Pt - Pt <sub>1</sub> | 10.6 ± 0.4 | 2.751  | 5.8 ± 0.18        | 1.20                           |
|                        | Pt - Pt <sub>2</sub> | 5.4 ± 1.5  | 3.890  | 9.1 ± 1.9         |                                |
|                        | Pt - Pt <sub>3</sub> | 12.7 ± 3.8 | 4.764  | 7.8 ± 1.4         |                                |
|                        | Pt - Pt <sub>4</sub> | 8.5 ± 1.4  | 5.502  | 9.9 ± 0.90        |                                |
| Commercial 20 wt% Pt/C | Pt - Pt <sub>1</sub> | 10.1 ± 0.3 | 2.749  | 5.9 ± 0.17        | 1.11                           |
|                        | Pt - Pt <sub>2</sub> | 5.1 ± 1.4  | 3.888  | 10 ± 2.1          |                                |
|                        | Pt - Pt <sub>3</sub> | 11.2 ± 3.3 | 4.762  | 8.1 ± 1.4         |                                |
|                        | Pt - Pt <sub>4</sub> | 8.3 ± 1.3  | 5.498  | 10.5 ± 0.95       |                                |

\* The error associated with distance to neighbouring atoms for the MOCD 20 wt% Pt/C and Commercial 20 wt% Pt/C is ± 0.00058 Å and ± 0.00056 Å, respectively

**Table S3:** Coordination numbers and distances of neighbouring atoms and their disorder factors of the 40 wt% Pt/C MOCD and commercial catalyst.

| Catalyst               | Neighbouring atom    | N          | R (Å)* | $\sigma^2 / 10^3$ | N <sub>3</sub> /N <sub>1</sub> |
|------------------------|----------------------|------------|--------|-------------------|--------------------------------|
| MOCD 40 wt% Pt/C       | Pt - Pt <sub>1</sub> | 10.4 ± 0.4 | 2.751  | 6.0 ± 0.19        | 1.20                           |
|                        | Pt - Pt <sub>2</sub> | 5.2 ± 1.5  | 3.891  | 9.0 ± 2.0         |                                |
|                        | Pt - Pt <sub>3</sub> | 12.5 ± 3.8 | 4.766  | 7.9 ± 1.4         |                                |
|                        | Pt - Pt <sub>4</sub> | 8.3 ± 1.4  | 5.503  | 9.9 ± 0.95        |                                |
| Commercial 40 wt% Pt/C | Pt - Pt <sub>1</sub> | 10.1 ± 0.3 | 2.753  | 5.7 ± 0.17        | 1.11                           |
|                        | Pt - Pt <sub>2</sub> | 5.0 ± 1.3  | 3.893  | 8.3 ± 1.6         |                                |
|                        | Pt - Pt <sub>3</sub> | 11.2 ± 3.4 | 4.768  | 7.6 ± 1.4         |                                |
|                        | Pt - Pt <sub>4</sub> | 8.7 ± 1.3  | 5.506  | 9.8 ± 0.85        |                                |

\* The error associated with distance to neighbouring atoms for the MOCD 40 wt% Pt/C and Commercial 40 wt% Pt/C is ± 0.00061 Å and ± 0.00055 Å, respectively

**Table S4:** Coordination numbers and distances of neighbouring atoms and their disorder factors of the 60 wt% Pt/C MOCD and commercial catalyst.

| Catalyst               | Neighbouring atom    | N          | R (Å)* | $\sigma^2 / 10^3$ | N <sub>3</sub> /N <sub>1</sub> |
|------------------------|----------------------|------------|--------|-------------------|--------------------------------|
| MOCD 60 wt% Pt/C       | Pt - Pt <sub>1</sub> | 10.5 ± 0.4 | 2.751  | 5.8 ± 0.18        | 1.17                           |
|                        | Pt - Pt <sub>2</sub> | 5.5 ± 1.5  | 3.891  | 9.0 ± 1.8         |                                |
|                        | Pt - Pt <sub>3</sub> | 12.3 ± 3.6 | 4.765  | 7.5 ± 1.3         |                                |
|                        | Pt - Pt <sub>4</sub> | 8.6 ± 1.4  | 5.502  | 9.7 ± 0.86        |                                |
| Commercial 60 wt% Pt/C | Pt - Pt <sub>1</sub> | 9.0 ± 0.3  | 2.749  | 6.0 ± 0.19        | 0.93                           |
|                        | Pt - Pt <sub>2</sub> | 5.1 ± 1.4  | 3.888  | 10.5 ± 2.3        |                                |
|                        | Pt - Pt <sub>3</sub> | 8.4 ± 2.8  | 4.762  | 7.4 ± 1.6         |                                |
|                        | Pt - Pt <sub>4</sub> | 8.3 ± 1.4  | 5.499  | 10.4 ± 1.0        |                                |

\* The error associated with distance to neighbouring atoms for the MOCD 60 wt% Pt/C and Commercial 60 wt% Pt/C is ± 0.00058 Å and ± 0.00062 Å, respectively

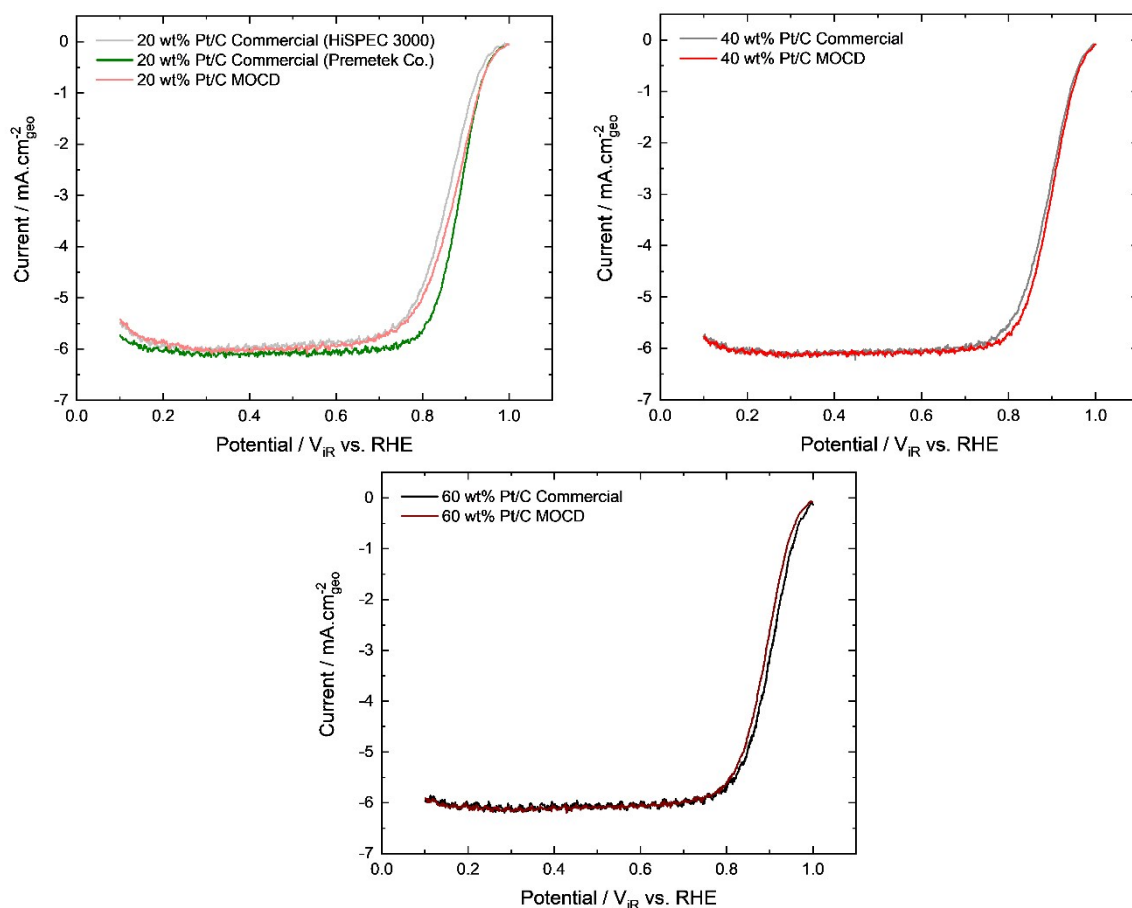

**Figure S3:** ORR linear sweep voltammograms of the four commercial Pt/C catalysts with the MOCD Pt/C catalysts, measured in  $O_2$  saturated 0.1 M  $HClO_4$  electrolyte at room temperature with a scan rate of  $20 \text{ mV.s}^{-1}$ .

**Table S5:** Electrochemically active surface area (ECSA), ORR mass activity and ORR specific activity for the MOCD and commercial catalysts, error bars from three electrodes and electrochemical characterisations. ORR activity measured in  $O_2$  saturated 0.1 M  $HClO_4$  electrolyte at room temperature with a scan rate of  $20 \text{ mV.s}^{-1}$ .

| Catalyst                              | ECSA<br>$/ \text{m}^2 \text{g}^{-1}_{\text{Pt}}$ | Mass Activity<br>$/ \text{A g}^{-1}_{\text{Pt}}$ | Specific Activity<br>$/ \mu\text{A cm}^{-1}_{\text{Pt}}$ |
|---------------------------------------|--------------------------------------------------|--------------------------------------------------|----------------------------------------------------------|
| MOCD 20 wt% Pt/C                      | $75.4 \pm 3.2$                                   | $426 \pm 33$                                     | $564 \pm 26$                                             |
| 20 wt% Pt/C (HiSPEC 3000, Alfa Aesar) | $76.6 \pm 3.6$                                   | $271 \pm 36$                                     | $354 \pm 46$                                             |
| 20 wt% Pt/C (Premetek)                | $88.0 \pm 0.2$                                   | $438 \pm 34$                                     | $497 \pm 37$                                             |

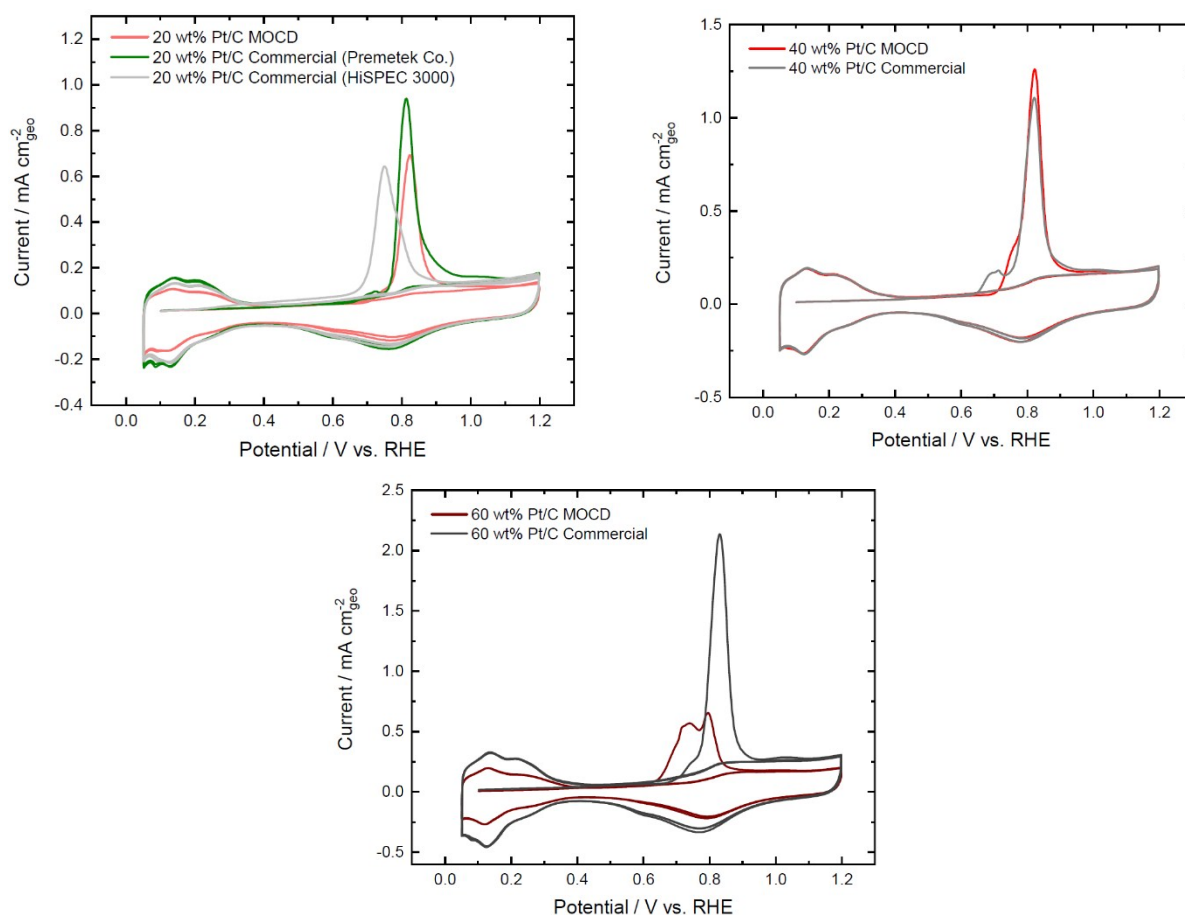

**Figure S4:** CO stripping voltammograms of the four commercial Pt/C catalysts with the MOCD Pt/C catalysts, measured in 0.1 M HClO<sub>4</sub> electrolyte at room temperature with a scan rate of 20 mV.s<sup>-1</sup>.

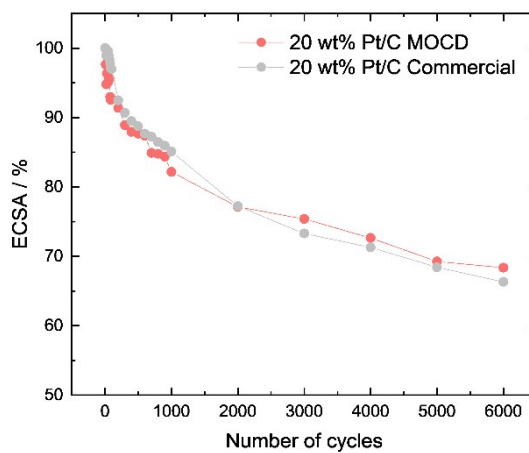

**Figure S5:** The change of ECSA after cycling between 0.6 – 1.0 V vs. RHE for 6000 cycles on the 20 wt% Pt/C MOCD and commercial catalysts in 0.1 M HClO<sub>4</sub> in room temperature at 20 mV.s<sup>-1</sup>.
